# Supplementary material
Source: publisher figshare collection journal article supplement (https://brill.figshare.com/ndownloader/files/28543503)
Supplement: Supplementary file 1 [file 28543503]

## Sheet: Table S2
Ancestral State Recontruction Rate Values
Cocoon Status
ARD				SYM				ER
-Ln	AIC	AICc	n. taxa	-LN	AIC	AICc	ntax	-LN	AIC	AICc	ntax
-53.6397	111.279	111.326	262	-60.6614	123.323	123.338	262	-60.6614	123.323	123.338	262
Rates:		0	1	Rates:		0	1	Rates:		0	1
	0	NA	0.00207413		0	NA	0.00090335		0	NA	0.00090335
	1	0.000211487	NA		1	0.00090335	NA		1	0.00090335	NA
Polymorphism: Strict
ARD				SYM				ER
-Ln	AIC	AICc	n. taxa	-LN	AIC	AICc	ntax	-LN	AIC	AICc	ntax
-111.028	226.057	226.103	262	-115.668	233.336	233.352	262	-115.668	233.336	233.352	262
Rates:		0	1	Rates:		0	1	Rates:		0	1
	0	NA	0.00317468		0	NA	0.00265162		0	NA	0.00265147
	1	0.0176026	NA		1	0.00265162	NA		1	0.00265147	NA
Polymorphism: Variable
ARD				SYM				ER
-Ln	AIC	AICc	n. taxa	-LN	AIC	AICc	ntax	-LN	AIC	AICc	ntax
-131.127	266.253	266.3	262	-139.777	281.554	281.569	262	-139.777	281.554	281.569	262
Rates:		0	1	Rates:		0	1	Rates:		0	1
	0	NA	0.00386912		0	NA	0.00390694		0	NA	0.00390707
	1	0.0142395	NA		1	0.00390694	NA		1	0.00390707	NA
Metapleural Gland (0&1 allowed)
ARD				SYM				ER
-Ln	AIC	AICc	n. taxa	-LN	AIC	AICc	ntax	-LN	AIC	AICc	ntax
-11.619	27.238	27.2843	262	-12.5885	27.177	27.1924	262	-12.5885	27.177	27.1924	262
Rates:		0	1	Rates:		0	1	Rates:		0	1
	0	NA	0.0427212		0	NA	0.000120265		0	NA	0.000120266
	1	0.000290243	NA		1	0.000120265	NA		1	0.000120266	NA
Ecological Correlation Rate Values (Based on ARD)
Metapleural Gland
DEP					IND
Fit					Fit
-lnL	AIC	AICc	N.traits	ntax	-lnL	AIC	AICc	N.traits	ntax
-63.3042	142.608	143.178	2	262	-69.8439	147.688	147.843	2	262
Rates					Rates
	(0,0)	(0,1)	(1,0)	(1,1)		(0,0)	(0,1)	(1,0)	(1,1)
(0,0)	NA	0.0298137	0.0161032	NA	(0,0)	NA	0.0347135	0.00211838	NA
(0,1)	0	NA	NA	0.000467697	(0,1)	0	NA	NA	0.00211838
(1,0)	0.0263165	NA	NA	0.0462441	(1,0)	0.000213944	NA	NA	0.0347135
(1,1)	NA	0	0	NA	(1,1)	NA	0.000213944	0	NA
Sting
DEP					IND
Fit					Fit
-lnL	AIC	AICc	N.traits	ntax	-lnL	AIC	AICc	N.traits	ntax
-114.945	245.889	246.459	2	262	-118.445	244.889	245.045	2	262
Rates					Rates
	(0,0)	(0,1)	(1,0)	(1,1)		(0,0)	(0,1)	(1,0)	(1,1)
(0,0)	NA	0	0.00227377	NA	(0,0)	NA	0.000323447	0.00211839	NA
(0,1)	0.000283942	NA	NA	0.00203259	(0,1)	0.00124677	NA	NA	0.00211839
(1,0)	0	NA	NA	0.000976064	(1,0)	0.000214052	NA	NA	0.000323447
(1,1)	NA	0.000268372	0.00173742	NA	(1,1)	NA	0.000214052	0.00124677	NA
Polymorphism (Strict)
DEP					IND
Fit					Fit
-lnL	AIC	AICc	N.traits	ntax	-lnL	AIC	AICc	N.traits	ntax
-158.788	333.576	334.145	2	262	-166.996	341.991	342.147	2	262
Rates					Rates
	(0,0)	(0,1)	(1,0)	(1,1)		(0,0)	(0,1)	(1,0)	(1,1)
(0,0)	NA	0.00118713	0.000348351	NA	(0,0)	NA	0.0031751	0.00211843	NA
(0,1)	0.0129448	NA	NA	0.00625889	(0,1)	0.0176012	NA	NA	0.00211843
(1,0)	0	NA	NA	0.00544331	(1,0)	0.000214029	NA	NA	0.0031751
(1,1)	NA	0.00145168	0.0378681	NA	(1,1)	NA	0.000214029	0.0176012	NA
Polymorphism (Size Variable)
DEP					IND
Fit					Fit
-lnL	AIC	AICc	N.traits	ntax	-lnL	AIC	AICc	N.traits	ntax
-179.698	375.397	375.966	2	262	-187.094	382.188	382.343	2	262
Rates					Rates
	(0,0)	(0,1)	(1,0)	(1,1)		(0,0)	(0,1)	(1,0)	(1,1)
(0,0)	NA	0.00132941	0.000433628	NA	(0,0)	NA	0.00386923	0.00211819	NA
(0,1)	0.0113105	NA	NA	0.00516066	(0,1)	0.0142387	NA	NA	0.00211819
(1,0)	0	NA	NA	0.00640425	(1,0)	0.000214028	NA	NA	0.00386923
(1,1)	NA	0.00107167	0.0314597	NA	(1,1)	NA	0.000214028	0.0142387	NA
Social Parasitism
DEP					IND
Fit					Fit
-lnL	AIC	AICc	N.traits	ntax	-lnL	AIC	AICc	N.traits	ntax
-135.919	287.839	288.408	2	262	-136.036	280.073	280.229	2	262
Rates					Rates
	(0,0)	(0,1)	(1,0)	(1,1)		(0,0)	(0,1)	(1,0)	(1,1)
(0,0)	NA	0.000844555	0.00255644	NA	(0,0)	NA	0.000633596	0.00211868	NA
(0,1)	0.0225953	NA	NA	0	(0,1)	0.0227151	NA	NA	0.00211868
(1,0)	0.000229151	NA	NA	0.00157425	(1,0)	0.000214064	NA	NA	0.000633596
(1,1)	NA	0	0.00517488	NA	(1,1)	NA	0.000214064	0.0227151	NA
Diet (Strict Herbivory)
DEP					IND
Fit					Fit
-lnL	AIC	AICc	N.traits	ntax	-lnL	AIC	AICc	N.traits	ntax
-118.645	253.291	253.87	2	262	120.283	248.566	248.722	2	262
Rates					Rates
	(0,0)	(0,1)	(1,0)	(1,1)		(0,0)	(0,1)	(1,0)	(1,1)
(0,0)	NA	0.00114978	0.00221027	NA	(0,0)	NA	0.00116524	0.00211812	NA
(0,1)	0.0243399	NA	NA	0.000636023	(0,1)	0	NA	NA	0.00211849
(1,0)	0.000242997	NA	NA	0.00152439	(1,0)	0.000214118	NA	NA	0.00116525
(1,1)	NA	0	0	NA	(1,1)	NA	0.000214118	0	NA
Diet ( Strict Carnivory)
DEP					IND
Fit					Fit
-lnL	AIC	AICc	N.traits	ntax	-lnL	AIC	AICc	N.traits	ntax
-155.034	326.068	326.637	2	262	-159.746	327.492	327.648	2	262
Rates					Rates
	(0,0)	(0,1)	(1,0)	(1,1)		(0,0)	(0,1)	(1,0)	(1,1)
(0,0)	NA	0.00232134	0.00283075	NA	(0,0)	NA	0.00312854	0.00211819	NA
(0,1)	0.00225139	NA	NA	0.0013907	(0,1)	0.00158576	NA	NA	0.00211819
(1,0)	0	NA	NA	0.00340095	(1,0)	0.00021399	NA	NA	0.00312854
(1,1)	NA	0.000775939	0.000571802	NA	(1,1)	NA	0.00021399	0.00158576	NA
Diet (Omnivore, broad)
DEP					IND
Fit					Fit
-lnL	AIC	AICc	N.traits	ntax	-lnL	AIC	AICc	N.traits	ntax
-172.16	360.32	360.889	2	262	-176.343	360.685	360.841	2	262
Rates					Rates
	(0,0)	(0,1)	(1,0)	(1,1)		(0,0)	(0,1)	(1,0)	(1,1)
(0,0)	NA	0.00234563	0.00133782	NA	(0,0)	NA	0.00146601	0.00211814	NA
(0,1)	0.00426975	NA	NA	0.00291402	(0,1)	0.00518739	NA	NA	0.00211814
(1,0)	0.000510758	NA	NA	0.000435159	(1,0)	0.000213919	NA	NA	0.00146601
(1,1)	NA	0	0.00561102	NA	(1,1)	NA	0.000213919	0.00518739	NA
Nesting (Strict Ground)
DEP					IND
Fit					Fit
-lnL	AIC	AICc	N.traits	ntax	-lnL	AIC	AICc	N.traits	ntax
-197.971	411.942	412.511	2	262	-199.048	406.096	406.251	2	262
Rates					Rates
	(0,0)	(0,1)	(1,0)	(1,1)		(0,0)	(0,1)	(1,0)	(1,1)
(0,0)	NA	0	0.00398397	NA	(0,0)	NA	0	0.00211888	NA
(0,1)	0.00385412	NA	NA	0.00166381	(0,1)	0.00436122	NA	NA	0.00211888
(1,0)	0.000409817	NA	NA	0	(1,0)	0.000214033	NA	NA	0
(1,1)	NA	0.000163565	0.00466496	NA	(1,1)	NA	0.000214033	0.00436122	NA
Nesting: Arboreal
DEP					IND
Fit					Fit
-lnL	AIC	AICc	N.traits	ntax	-lnL	AIC	AICc	N.traits	ntax
-142.612	301.224	301.793	2	262	-146.384	300.767	300.923	2	262
Rates					Rates
	(0,0)	(0,1)	(1,0)	(1,1)		(0,0)	(0,1)	(1,0)	(1,1)
(0,0)	NA	0.00127798	0.00160491	NA	(0,0)	NA	0.0016549	0.00211843	NA
(0,1)	0	NA	NA	0.0119515	(0,1)	0	NA	NA	0.00211843
(1,0)	0.000237161	NA	NA	0.00189349	(1,0)	0.000214016	NA	NA	0.0016549
(1,1)	NA	0	0	NA	(1,1)	NA	0.000214016	0	NA
Nesting: Broad
DEP					IND
Fit					Fit
-lnL	AIC	AICc	N.traits	ntax	-lnL	AIC	AICc	N.traits	ntax
-176.536	369.072	369.641	2	262	-177.605	363.209	363.365	2	262
Rates					Rates
	(0,0)	(0,1)	(1,0)	(1,1)		(0,0)	(0,1)	(1,0)	(1,1)
(0,0)	NA	0.0043957	0.0028836	NA	(0,0)	NA	0.0216961	0.00211851	NA
(0,1)	0.00324008	NA	NA	0.00198779	(0,1)	0.00468521	NA	NA	0.00211851
(1,0)	0.000641144	NA	NA	0.0339405	(1,0)	0.000213976	NA	NA	0.0216961
(1,1)	NA	0.000137915	0.00665038	NA	(1,1)	NA	0.000213976	0.00468521	NA
Climate: lives in all regions
DEP					IND
Fit					Fit
-lnL	AIC	AICc	N.traits	ntax	-lnL	AIC	AICc	N.traits	ntax
-221.06	458.121	458.69	2	262	-223.192	454.385	454.54	2	262
Rates					Rates
	(0,0)	(0,1)	(1,0)	(1,1)		(0,0)	(0,1)	(1,0)	(1,1)
(0,0)	NA	0.0122416	0.000140145	NA	(0,0)	NA	0.328116	0.00211843	NA
(0,1)	0.0214996	NA	NA	0.00598195	(0,1)	0.648776	NA	NA	0.00211843
(1,0)	0	NA	NA	0.0108973	(1,0)	0.000214083	NA	NA	0.328116
(1,1)	NA	0.000676812	0.0240183	NA
Climate: Subtropics
DEP					IND
Fit					Fit
-lnL	AIC	AICc	N.traits	ntax	-lnL	AIC	AICc	N.traits	ntax
-85.2718	186.544	187.113	2	262	-88.23	184.46	184.615	2	262
Rates					Rates
	(0,0)	(0,1)	(1,0)	(1,1)		(0,0)	(0,1)	(1,0)	(1,1)
(0,0)	NA	0.00167353	0.000812761	NA	(0,0)	NA	0.0262102	0.00211836	NA
(0,1)	0.0204199	NA	NA	0.0272731	(0,1)	0.954796	NA	NA	0.00211836
(1,0)	0	NA	NA	2.43905	(1,0)	0.000213881	NA	NA	0.0262102
(1,1)	NA	0	100	NA	(1,1)	NA	0.000213881	0.954796	NA
Climate: Temperate
DEP					IND
Fit					Fit
-lnL	AIC	AICc	N.traits	ntax	-lnL	AIC	AICc	N.traits	ntax
-81.7829	179.566	180.1351	2	262	-83.3159	174.632	174.787	2	262
Rates					Rates
	(0,0)	(0,1)	(1,0)	(1,1)		(0,0)	(0,1)	(1,0)	(1,1)
(0,0)	NA	2.17391	0.00146696	NA	(0,0)	NA	0.000860061	0.00211853	NA
(0,1)	100	NA	NA	0	(0,1)	0.0444189	NA	NA	0.00211853
(1,0)	0	NA	NA	0.000609591	(1,0)	0.000214051	NA	NA	0.000860061
(1,1)	NA	0.0157933	0.0240069	NA	(1,1)	NA	0.000214051	0.0444189	NA
Climate: Tropics
DEP					IND
Fit					Fit
-lnL	AIC	AICc	N.traits	ntax	-lnL	AIC	AICc	N.traits	ntax
-180.32	376.64	377.209	2	262	-183.04	374.081	374.236	2	262
Rates					Rates
	(0,0)	(0,1)	(1,0)	(1,1)		(0,0)	(0,1)	(1,0)	(1,1)
(0,0)	NA	0.00347155	0	NA	(0,0)	NA	0.00561001	0.00211815	NA
(0,1)	0.0167948	NA	NA	0.00775696	(0,1)	0.024611	NA	NA	0.00211815
(1,0)	0.000317931	NA	NA	0.00570439	(1,0)	0.000214155	NA	NA	0.00561001
(1,1)	NA	0	0.0283848	NA	(1,1)	NA	0.000214155	0.024611	NA
Climate: tropics&subtropics
DEP					IND
Fit					Fit
-lnL	AIC	AICc	N.traits	ntax	-lnL	AIC	AICc	N.traits	ntax
-220.097	456.194	456.763	2	262	-224.319	456.638	456.794	2	262
Rates					Rates
	(0,0)	(0,1)	(1,0)	(1,1)		(0,0)	(0,1)	(1,0)	(1,1)
(0,0)	NA	0.0050941	0.0034488	NA	(0,0)	NA	0.00949948	0.00211859	NA
(0,1)	0.0100919	NA	NA	0	(0,1)	0.0157979	NA	NA	0.00211859
(1,0)	0.000341783	NA	NA	55.5559	(1,0)	0.000214022	NA	NA	0.00949948
(1,1)	NA	0	100	NA	(1,1)	NA	0.000214022	0.0157979	NA
Climate: subtropics&temperate
DEP					IND
Fit					Fit
-lnL	AIC	AICc	N.traits	ntax	-lnL	AIC	AICc	N.traits	ntax
-109.387	234.774	235.343	2	262	-109.691	227.381	227.537	2	262
Rates					Rates
	(0,0)	(0,1)	(1,0)	(1,1)		(0,0)	(0,1)	(1,0)	(1,1)
(0,0)	NA	0.000942041	0.00233115	NA	(0,0)	NA	0.00174589	0.0021184	NA
(0,1)	0.0265738	NA	NA	0	(0,1)	0.0352539	NA	NA	0.0021184
(1,0)	0.000224624	NA	NA	0.00190248	(1,0)	0.000213979	NA	NA	0.00174589
(1,1)	NA	0	0.0344904	NA	(1,1)	NA	0.000213979	0.0352539	NA
